# Supplementary material for: Life-Long Genetic and Functional Access to Neural Circuits Using Self-Inactivating Rabies Virus
Source: PubMed Central journal article supplement (PMC5509544; doi:10.1016/j.cell.2017.06.014), 2017-07-13
Supplement: mmc1.pdf [file mmc1.pdf]

**Cell, Volume 170**

**Supplemental Information**

**Life-Long Genetic and Functional Access  
to Neural Circuits Using Self-Inactivating  
Rabies Virus**

**Ernesto Ciabatti, Ana González-Rueda, Letizia Mariotti, Fabio Morgese, and Marco Tripodi**

| <b>Rabies</b>                                                                | <b>N-terTAGs</b>                                     | <b>C-terPEST</b>                                         |
|------------------------------------------------------------------------------|------------------------------------------------------|----------------------------------------------------------|
| pSAD-F3-mCherry                                                              | -                                                    | -                                                        |
| pSAD-F3-N-terTAGs-mCherry                                                    | N <sup>Myc</sup> -P <sup>FLAG</sup> -M <sup>V5</sup> | -                                                        |
| pSAD-F3-N-terTAGs-N <sup>PEST</sup> -mCherry                                 | N <sup>Myc</sup> -P <sup>FLAG</sup> -M <sup>V5</sup> | N <sup>PEST</sup>                                        |
| pSAD-F3-N-terTAGs-M <sup>PEST</sup> -mCherry                                 | N <sup>Myc</sup> -P <sup>FLAG</sup> -M <sup>V5</sup> | M <sup>PEST</sup>                                        |
| pSAD-F3-N-terTAGs-P <sup>PEST</sup> -mCherry                                 | N <sup>Myc</sup> -P <sup>FLAG</sup> -M <sup>V5</sup> | P <sup>PEST</sup>                                        |
| pSAD-F3-N-terTAGs-L <sup>PEST</sup> -mCherry                                 | N <sup>Myc</sup> -P <sup>FLAG</sup> -M <sup>V5</sup> | L <sup>PEST</sup>                                        |
| pSAD-F3-N <sup>PEST</sup> -mCherry (SiR <sup>mCherry</sup> )                 | -                                                    | N <sup>PEST</sup>                                        |
| pSAD-F3-N-terTAGs-(P+L) <sup>PEST</sup> -mCherry                             | N <sup>Myc</sup> -P <sup>FLAG</sup> -M <sup>V5</sup> | P <sup>PEST</sup> L <sup>PEST</sup>                      |
| pSAD-F3-(P+L+N) <sup>PEST</sup> -mCherry                                     | -                                                    | P <sup>PEST</sup> L <sup>PEST</sup><br>N <sup>PEST</sup> |
| pSAD-F3-N <sup>PEST</sup> -iCRE-2A-mCherryPEST (SiR <sup>CRE-mCherry</sup> ) | -                                                    | N <sup>PEST</sup>                                        |
| pSAD-F3-N <sup>PEST</sup> -cTEVp-FKBP-2A-FRB-NTEVp-iCRE                      | -                                                    | N <sup>PEST</sup>                                        |
| pSAD-F3-N <sup>PEST</sup> -FLP <sub>o</sub> (SiR <sup>FLP</sup> )            | -                                                    | N <sup>PEST</sup>                                        |
| <b>Lentiviruses</b>                                                          | <b>Gene A</b>                                        | <b>Gene B</b>                                            |
| pLenti-H2BGFP-2A-GlySAD                                                      | H2BGFP                                               | GlySAD                                                   |
| pLenti-puro-2A-TEVp                                                          | Puromycin N-Acetyl-Transferase (PAC)                 | TEVp                                                     |
| pLenti-GFP                                                                   | GFP                                                  | -                                                        |
| pLenti-H2BGFP-2A-oG                                                          | H2BGFP                                               | oG                                                       |
| <b>AAVs</b>                                                                  | <b>Gene A</b>                                        | <b>Gene B</b>                                            |
| AAV-CMV-TVAmCherry-2A-G                                                      | TVAmCherry                                           | G                                                        |
| AAV-TRE <sub>tight</sub> -TEVp-CMV-rtTA                                      | TEVp (doxy dependent)                                | rtTA                                                     |
| AAV-CAG-GCaMP6s                                                              | GCaMP6s                                              | -                                                        |
| AAV-CAG-FRT-H2BGFP                                                           | H2BGFP (FLP dependent)                               | -                                                        |
| AAV-CMV-FLEX-TVAmCherry-2A-oG                                                | TVAmCherry (CRE dependent)                           | oG (CRE dependent)                                       |

**Table S1.**

List of viral constructs generated for the study, Related to Figure 1

|                                      | <i>Rosa-LoxP-STOP-LoxP-tdTomato</i><br>mice |                |                |                | <i>Rosa-LoxP-STOP-LoxP-ChR2YFP</i><br>mice |                |                 |                |
|--------------------------------------|---------------------------------------------|----------------|----------------|----------------|--------------------------------------------|----------------|-----------------|----------------|
|                                      | 1 week p.i.                                 |                | 5 months p.i.  |                | 1 week p.i.                                |                | 2 months p.i.   |                |
|                                      | SiR+<br>tdTom+                              | CTR            | SiR+<br>tdTom+ | CTR            | SiR +<br>ChR2 +                            | CTR            | SiR +<br>ChR2 + | CTR            |
|                                      | n = 14                                      | n = 14         | n = 10         | n = 9          | n = 17                                     | n = 15         | n = 19          | n = 17         |
| <b>RMP<br/>(mV)</b>                  | -60.4<br>± 0.9                              | -58.4<br>± 1.0 | -61.8<br>± 1.5 | -62.8<br>± 1.1 | -57.8<br>± 0.6                             | -59.1<br>± 1.1 | -57.0<br>± 1.0  | -57.2<br>± 0.9 |
| <b>Input<br/>Resistance<br/>(MΩ)</b> | 274<br>± 28                                 | 267<br>± 24    | 250<br>± 26    | 260<br>± 43    | 249<br>± 15                                | 249<br>± 23    | 274<br>± 24     | 290<br>± 24    |
| <b>AP<br/>amplitude<br/>(mV)</b>     | 102.9<br>± 3.0                              | 99.4<br>± 3.2  | 99.8<br>± 3.3  | 99.7<br>± 3.0  | 98.6<br>± 1.9                              | 101.5<br>± 1.7 | 97.8<br>± 2.6   | 99.7<br>± 3.0  |
| <b>AP half-<br/>width<br/>(ms)</b>   | 2.0<br>± 0.1                                | 2.0<br>± 0.1   | 2.0<br>± 0.1   | 2.0<br>± 0.1   | 2.3<br>± 0.1                               | 2.1<br>± 0.1   | 2.3<br>± 0.1    | 2.2<br>± 0.1   |
| <b>AP<br/>threshold<br/>(mV)</b>     | -45.3<br>± 1.6                              | -45.7<br>± 0.9 | -45.9<br>± 1.1 | -46.1<br>± 1.0 | -45.3<br>± 0.8                             | -45.8<br>± 1.1 | -43.9<br>± 1.4  | -43.6<br>± 1.7 |

**Table S2**

Electrophysiological properties of SiR infected neurons compared to neighboring non-infected neurons recorded in *Rosa-LoxP-STOP-LoxP-tdTomato* and *Rosa-LoxP-STOP-LoxP-ChR2YFP* mice, Related to Figure 5
